# Supplementary material
Source: Springer Nature journal article supplement (https://www.springermedizin.de/resource/supplementary/12943_2011_949_MOESM10_ESM.pdf/9551742)

**A**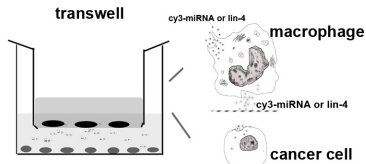**C**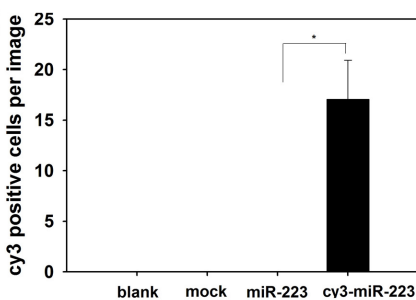**B**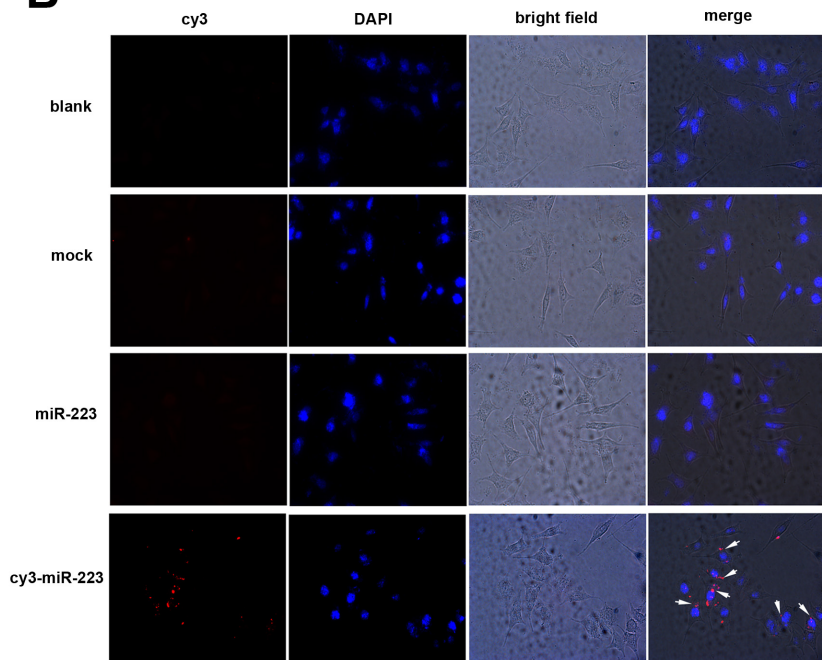**D**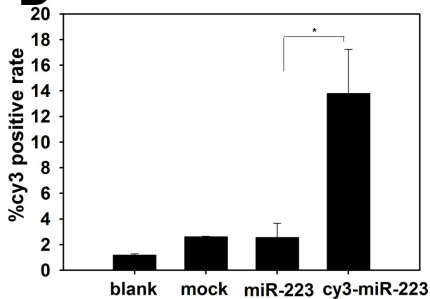**E**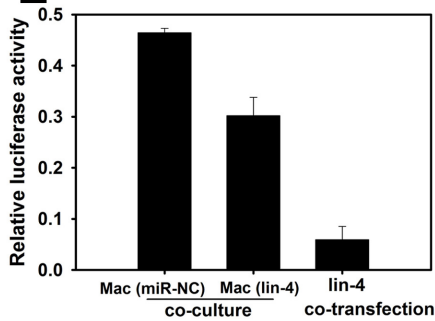

Supplement: MOESM10 [file 9551742]
